# Supplementary material
Source: MDPI journal article supplement (https://www.mdpi.com/2297-8739/10/2/73)
Supplement: s1 [file s1]

# Preparation of Tryptanthrin Derivates Bearing a Thiosemicarbazone Moiety to Inhibit SARS-CoV-2 Replication

Kateřina Veselá <sup>1,2,3</sup>, Zora Mělková <sup>2,3,4</sup>, Nikita Abramenko <sup>2</sup>, Zdeněk Kejík <sup>1,2,3</sup>, Robert Kaplánek <sup>2,5</sup>, Petr Dytrych <sup>6</sup>, Alla Sinica <sup>1,2</sup>, Oleksandra Vozniuk <sup>1</sup>, Pavel Martásek <sup>3</sup> and Milan Jakubek <sup>1,2,3,\*</sup>

<sup>1</sup> Department of Analytical Chemistry, Faculty of Chemical Engineering, University of Chemistry and Technology, Technická 6, 166 28 Prague, Czech Republic

<sup>2</sup> BIOCEV, Biotechnology and Biomedicine Center of the Academy of Sciences and Charles University in Vestec, Průmyslová 595, 252 50 Vestec, Czech Republic

<sup>3</sup> Department of Paediatrics and Inherited Metabolic Disorders, First Faculty of Medicine, Charles University and General University Hospital in Prague, Ke Karlovu 455/2, 128 08 Prague, Czech Republic

<sup>4</sup> Department of Immunology and Microbiology, First Faculty of Medicine, Charles University, Studničkova 7, 128 00 Prague, Czech Republic

<sup>5</sup> Department of Chemistry of Natural Compounds, Faculty of Food and Biochemical Technology, University of Chemistry and Technology, Technická 6, 166 28 Prague, Czech Republic

<sup>6</sup> Department of Surgery-Department of Abdominal, Thoracic Surgery and Traumatology, First Faculty of Medicine, Charles University and General University Hospital in Prague, U Nemocnice 2, 121 08 Prague, Czech Republic

\* Correspondence: milan.jakubek@lf1.cuni.cz (M.J.)

## Context>

Figure S1: Titration and titration curves of **PAA-TSC** receptor with Fe(III) ion

Figure S2: Titration and titration curves of **PAA-TSC** receptor with Fe(II) ion

Figure S3: Titration and titration curves of **T8H-TSC** receptor with Cu(II) ion

Figure S4: Titration and titration curves of **T8H-TSC** receptor with Fe(III) ion

Figure S5: Titration and titration curves of **T8H-TSC** receptor with Fe(II) ion

Figure S6: Colour change after addition of Cu(II) ion to receptors (**PAA-TSC** and **T8H-TSC**)

Figure S7: Infrared spectra of **PAA-TSC** receptor and its complex with Cu(II) ion

Figure S8: Raman spectra of **PAA-TSC** receptor and its complex with Cu(II) ion

Figure S9: Infrared spectra of **T8H-TSC** receptor and its complex with Cu(II) ion

Figure S10: Raman spectra of **T8H-TSC** receptor and its complex with Cu(II) ion.

Table S1: Determination of limit of detection and linear range for **PAA-TSC** and **T8H-TSC** complexes with Cu (II) and Fe(II/III)

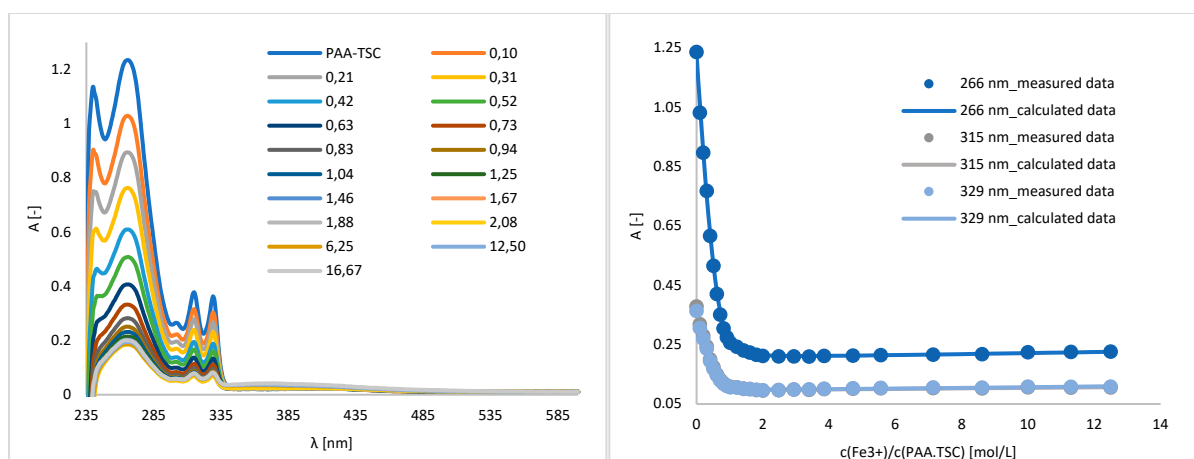

Figure S1: Titration and titration curves of **PAA-TSC** receptor with Fe(III) ion in water (water/DMSO, 99:1, v/v). Titration curves were measured at the absorption maxima (266 nm, 315 nm, 329 nm) of **PAA-TSC** receptor.

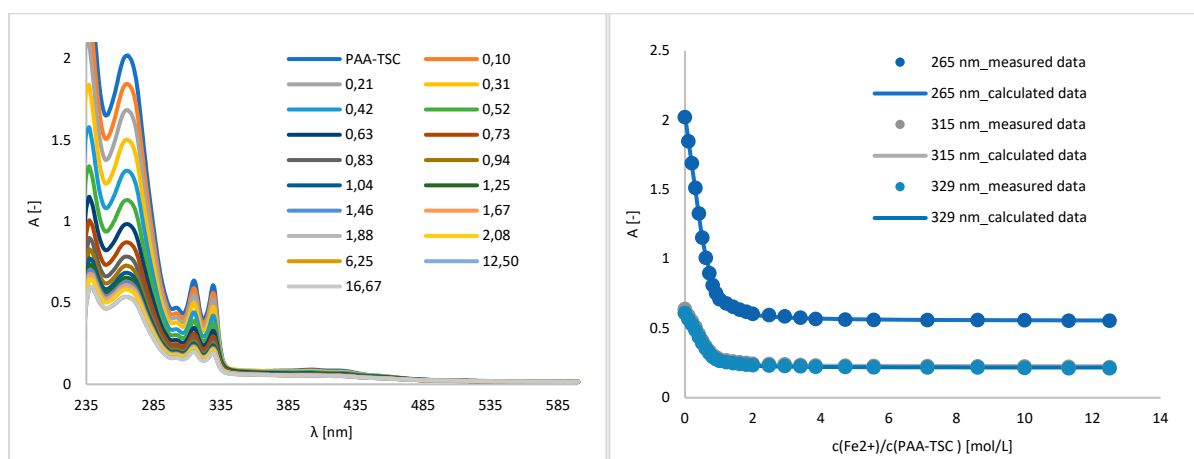

Figure S2: Titration and titration curves of **PAA-TSC** receptor with Fe(II) ion in water (water/DMSO, 99:1, v/v). Titration curves were measured at the absorption maxima (265 nm, 315 nm, 329 nm) of **PAA-TSC** receptor.

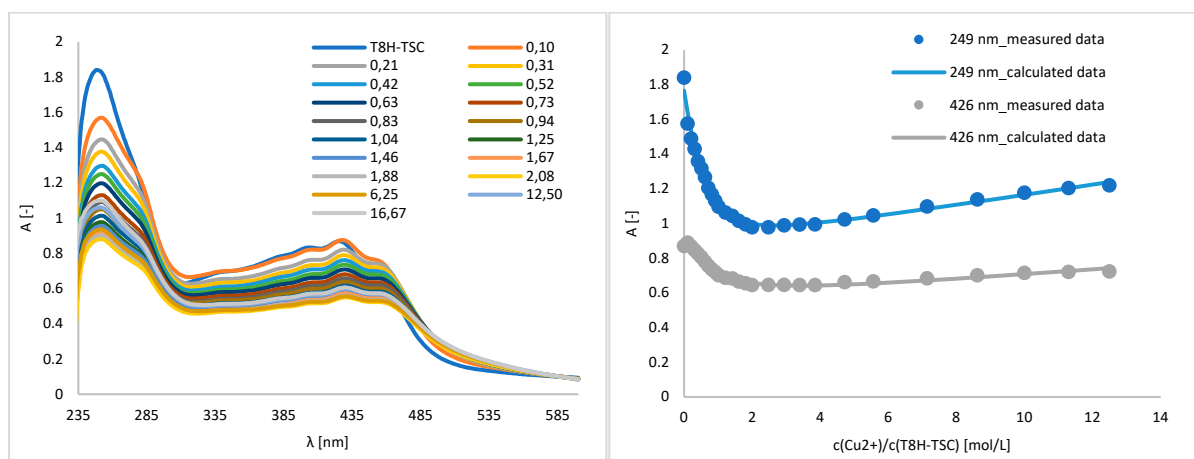

Figure S3: Titration and titration curves of **T8H-TSC** receptor with Cu(II) ion in water (water/DMSO, 99:1, v/v). Titration curves were measured at the absorption maxima (249 nm, 426 nm) of **T8H-TSC** receptor.

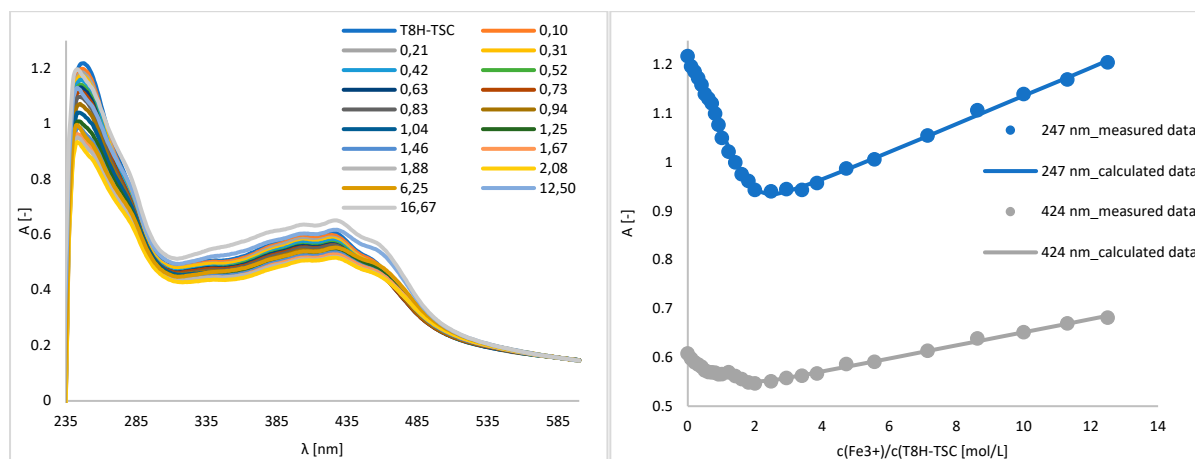

Figure S4: Titration and titration curves of **T8H-TSC** receptor with Fe(III) ion in water (water/DMSO, 99:1, v/v). Titration curves were measured at the absorption maxima (247 nm, 424 nm) of **T8H-TSC** receptor.

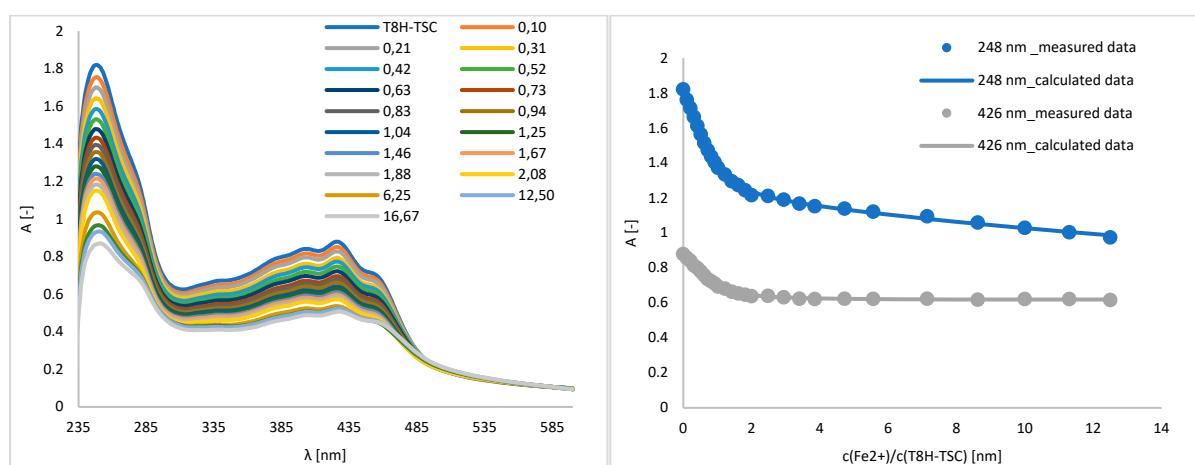

Figure S5: Titration and titration curves of **T8H-TSC** receptor with Fe(II) ion in water (water/DMSO, 99:1, v/v). Titration curves were measured at the absorption maxima (248 nm, 426 nm) of **T8H-TSC** receptor.

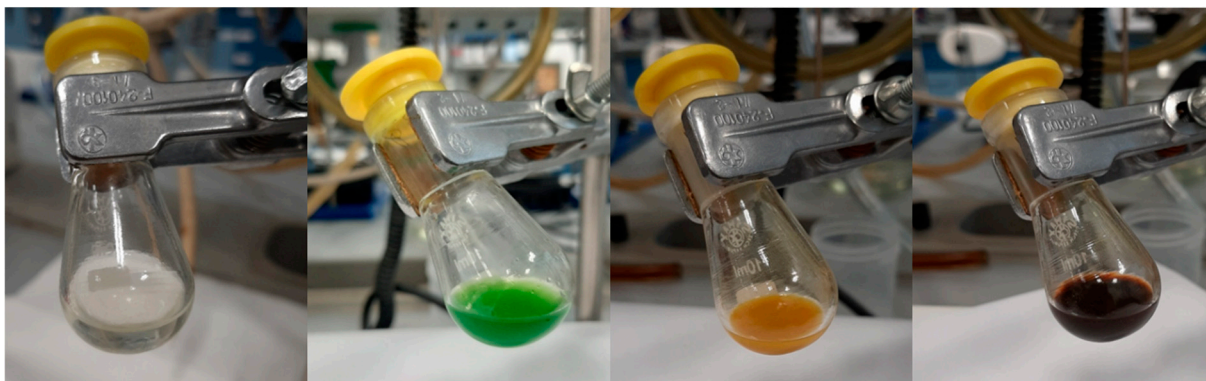

Figure S6: Colour change after addition of Cu(II) ion to receptors (**PAA-TSC** and **T8H-TSC**). **PAA-TSC** receptor (left) showed a green coloration of the solution and **T8H-TSC** receptor (right) showed a brown coloration of the solution. Receptors were dissolved in dichloromethane in 1:1 ratio.

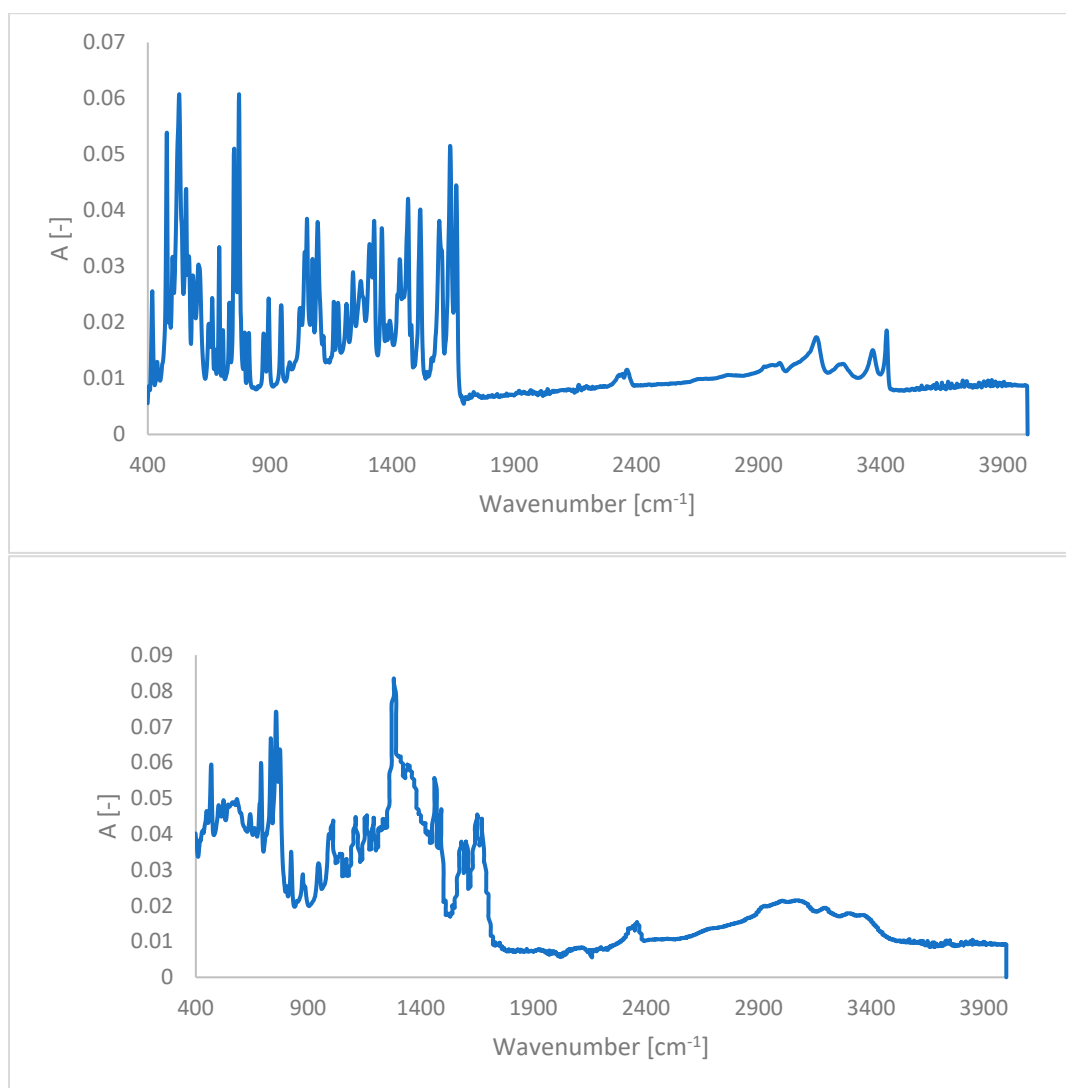

Figure S7: Infrared spectra of **PAA-TSC** receptor (up) and its complex with Cu(II) ion (down).

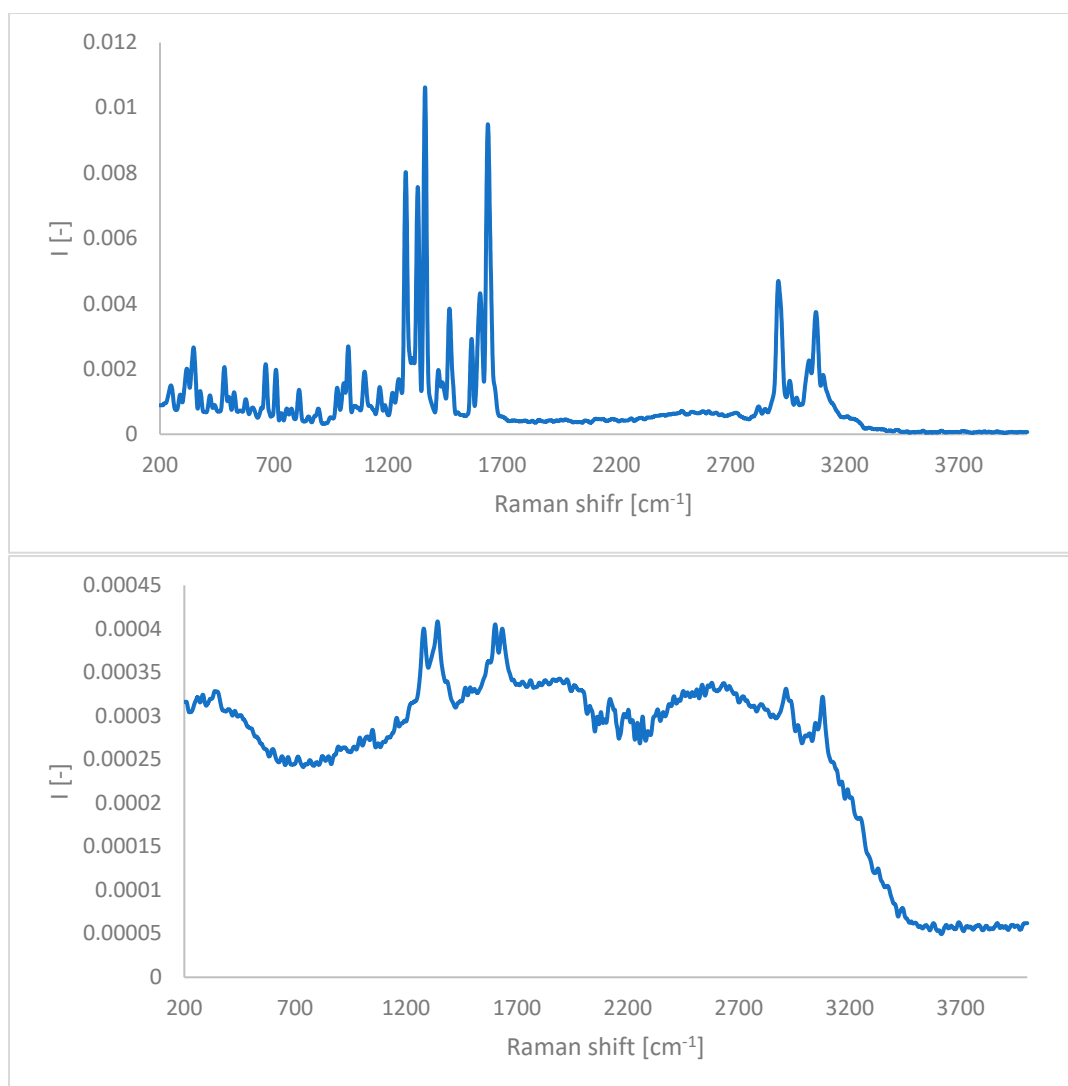

Figure S8: Raman spectra of **PAA-TSC** receptor (up) and its complex with Cu(II) ion (down).

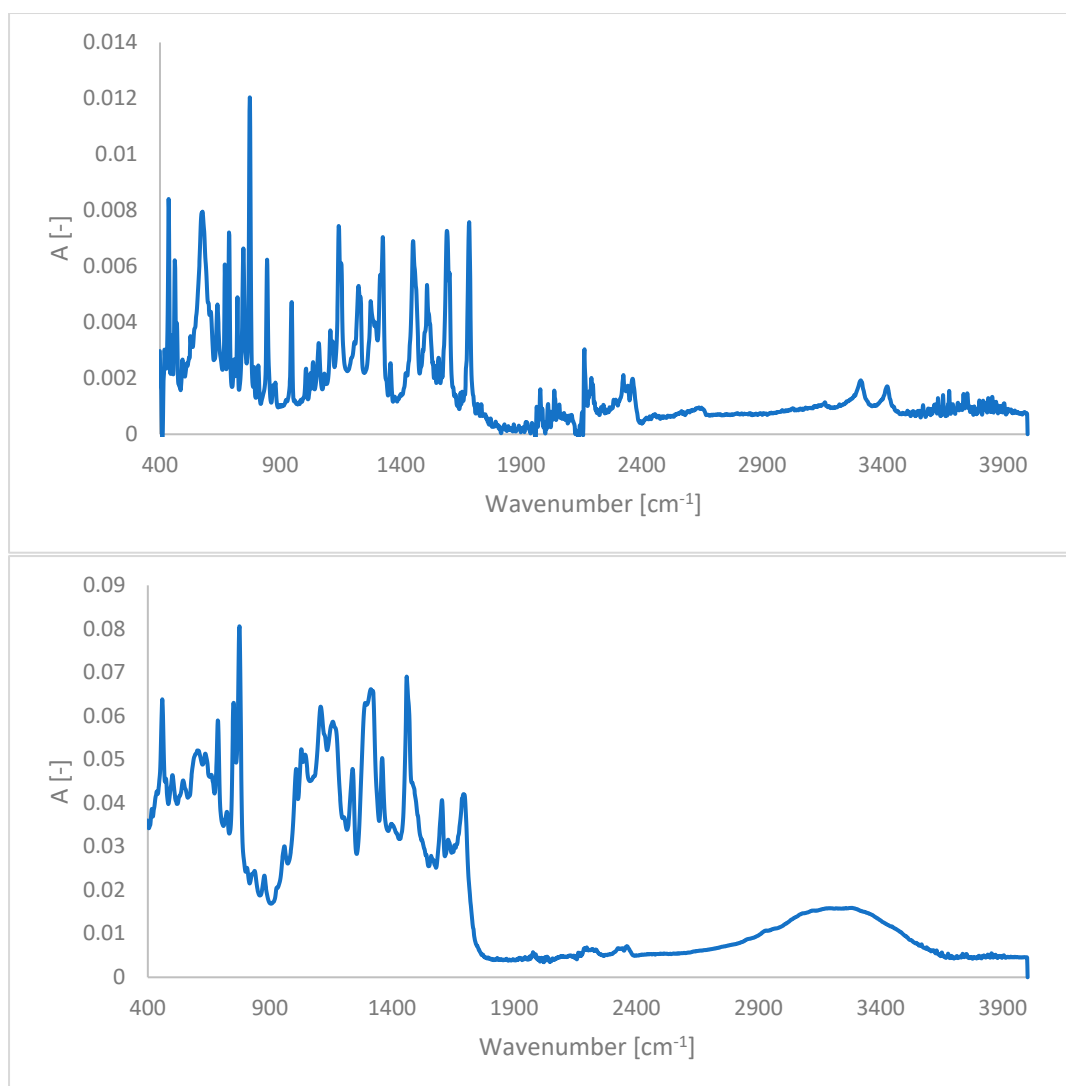

Figure S9: Infrared spectra of **T8H-TSC** receptor (up) and its complex with Cu(II) ion (down).

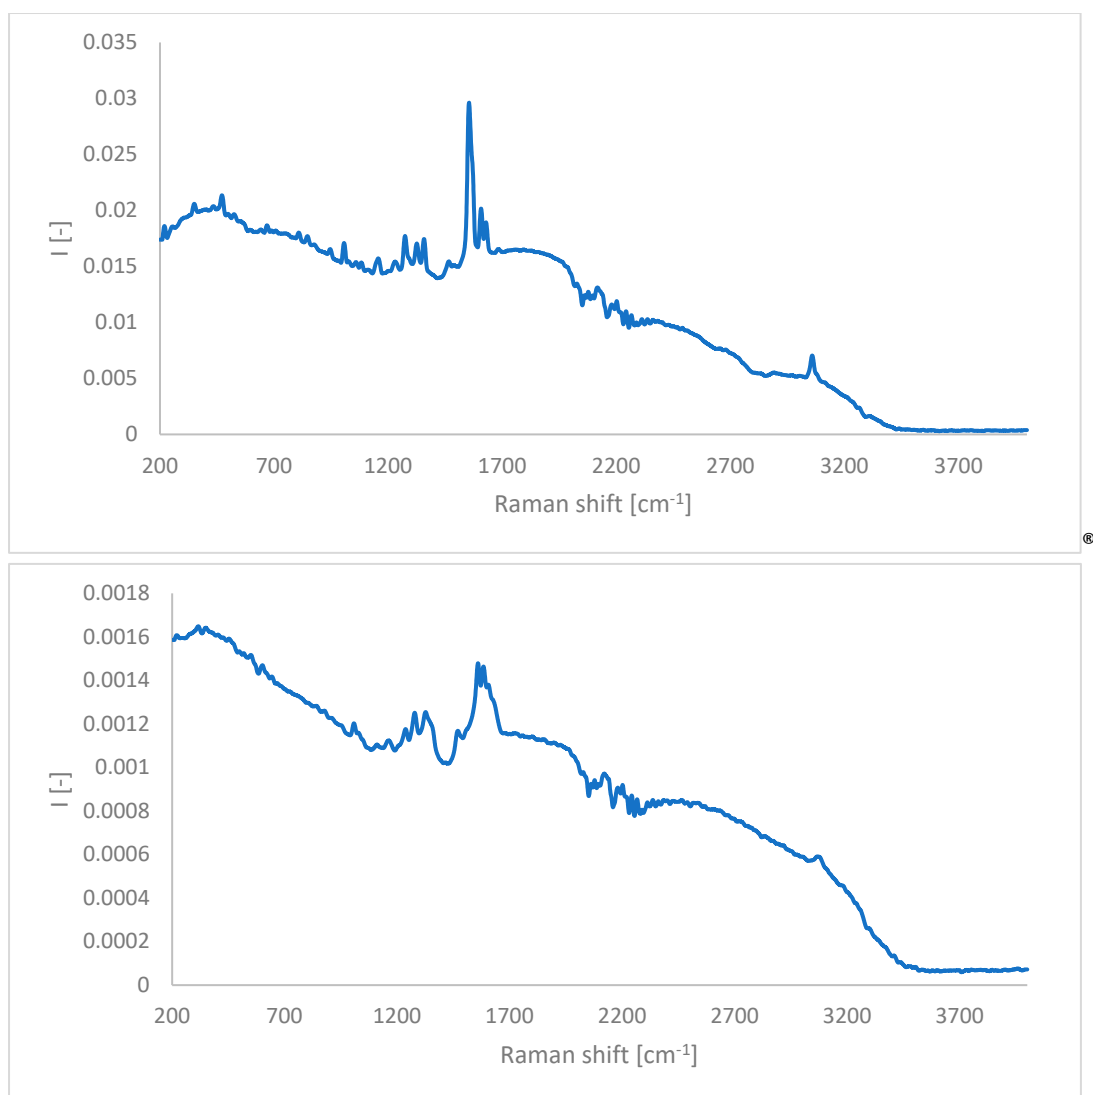

Figure S10: Raman spectra of **T8H-TSC** receptor (up) and its complex with  $\text{Cu(II)}$  ion (down).

Table S1: Determination of limit of detection and linear range for PAA-TSC and T8H-TSC complexes with  $\text{Cu(II)}$  and  $\text{Fe(II/III)}$  in their absorption maxima.

| Compound                | Wavelength | Limit of detection [M] | Linear range [M]           |
|-------------------------|------------|------------------------|----------------------------|
| <b>PAA-TSC -Cu(II)</b>  | 265        | $1.14 \cdot 10^{-5}$   | $0\text{-}5 \cdot 10^{-5}$ |
|                         | 315        | $1.33 \cdot 10^{-5}$   |                            |
|                         | 329        | $1.74 \cdot 10^{-5}$   |                            |
| <b>PAA-TSC -Fe(III)</b> | 265        | $8.29 \cdot 10^{-6}$   | $0\text{-}6 \cdot 10^{-5}$ |
|                         | 315        | $7.63 \cdot 10^{-6}$   |                            |
|                         | 329        | $7.63 \cdot 10^{-6}$   |                            |
| <b>PAA-TSC -Fe(II)</b>  | 265        | $9.43 \cdot 10^{-6}$   | $0\text{-}7 \cdot 10^{-5}$ |

|                        |     |                      |                        |
|------------------------|-----|----------------------|------------------------|
|                        | 315 | $9.62 \cdot 10^{-6}$ | $0-8 \cdot 10^{-5}$    |
|                        | 329 | $9.67 \cdot 10^{-6}$ |                        |
| <b>T8H-TSC-Cu(II)</b>  | 249 | $2.75 \cdot 10^{-6}$ | $0-8 \cdot 10^{-5}$    |
|                        | 426 | $1.01 \cdot 10^{-5}$ | $0-1 \cdot 10^{-4}$    |
| <b>T8H-TSC-Fe(III)</b> | 247 | $1.63 \cdot 10^{-5}$ | $0-1.6 \cdot 10^{-4}$  |
|                        | 424 | $6.81 \cdot 10^{-6}$ | $0-6.17 \cdot 10^{-5}$ |
| <b>T8H-TSC-Fe(II)</b>  | 248 | $6.60 \cdot 10^{-6}$ | $0-1 \cdot 10^{-4}$    |
|                        | 426 | $8.06 \cdot 10^{-6}$ |                        |
